# Supplementary material for: Partial oxidation of methane to synthesis gas over Pt nanoparticles supported on nanocrystalline CeO2 catalyst
Source: Royal Society of Chemistry journal article supplement (doi:10.1039/c5cy02088c), 2016-01-01
Supplement: c5cy02088c1.pdf [file c5cy02088c1.pdf]

Supporting Information

## Partial Oxidation of Methane to Synthesis Gas over Pt Nanoparticles Supported on Nanocrystalline CeO<sub>2</sub> Catalyst

Rajib Kumar Singha,<sup>a</sup> Shilpi Ghosh,<sup>a</sup> Shankha Subhra Acharyya,<sup>a</sup> Aditya Yadav,<sup>a</sup> Astha Shukla,<sup>a</sup> Takehiko Sasaki,<sup>b</sup> Anna Maria Venezia,<sup>c</sup> Chandrashekar Pendem<sup>a</sup> and Rajaram Bal\*<sup>a</sup>

<sup>a</sup>Nanocatalysis Area, Refining Technology Division, CSIR-Indian Institute of Petroleum, Dehradun 248005, India. Fax: +91 135 2660202; Tel: +91 135 2525917.

<sup>b</sup>Department of Complexity Science and Engineering, Graduate School of Frontier Sciences, The University of Tokyo, Kashiwanoha, Kashiwa-shi, Chiba 277-8561, Japan.

<sup>c</sup>ISMN-CNR, Via Ugo La Malfa 153, 90146 Palermo, Italy.

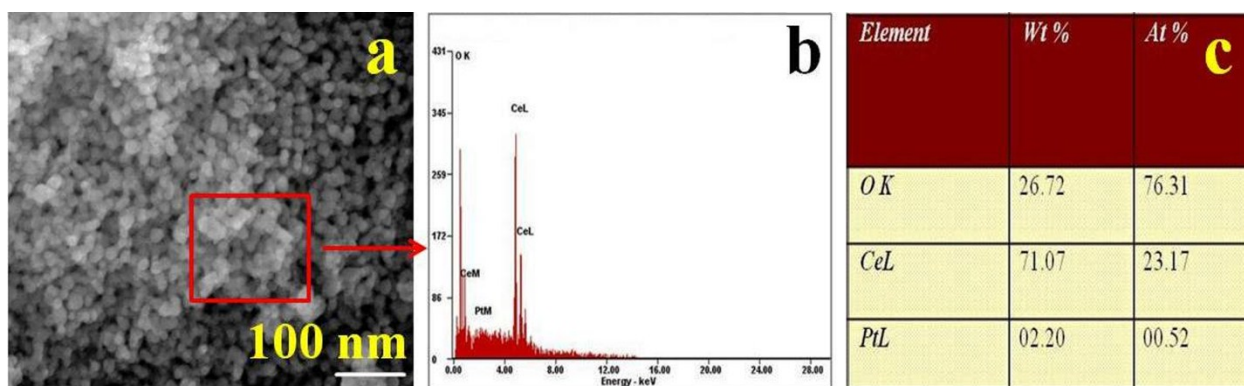

**Fig. S1.** (a) SEM image of 2Pt-CeO<sub>2</sub><sup>PS</sup> catalyst, (b) EDAX of the indicated portion of the sample and (c) Elemental composition obtained from the EDAX analysis.

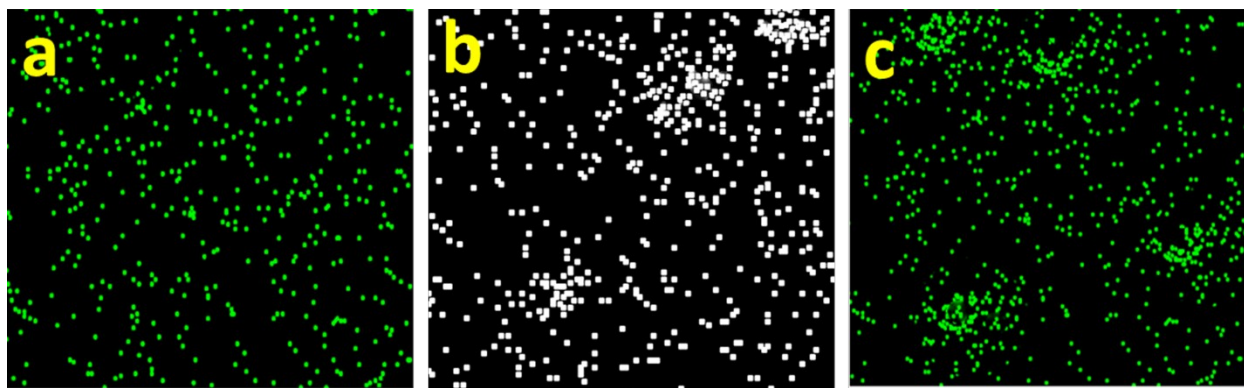

**Fig. S2.** Elemental mapping of Pt from SEM analysis, (a)  $2\text{Pt-CeO}_2^{\text{PS}}$ , (b)  $2\text{Pt-CeO}_2^{\text{Imp}}$  and (c)  $2\text{Pt-CeO}_2^{\text{PSCom}}$  catalyst.

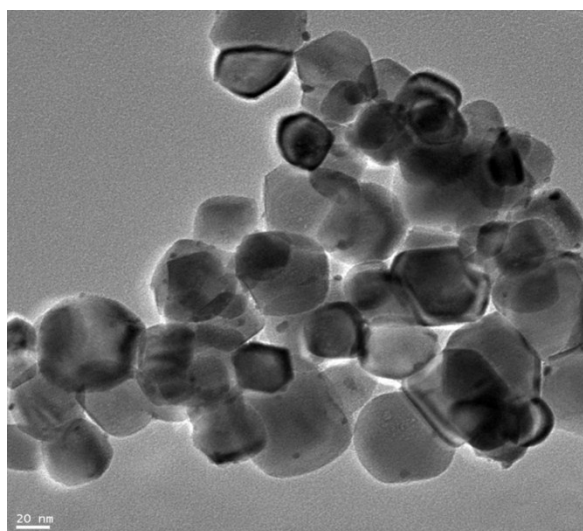

**Fig. S3.** TEM image of the prepared  $2\text{Pt-CeO}_2^{\text{PS}}$  catalyst.

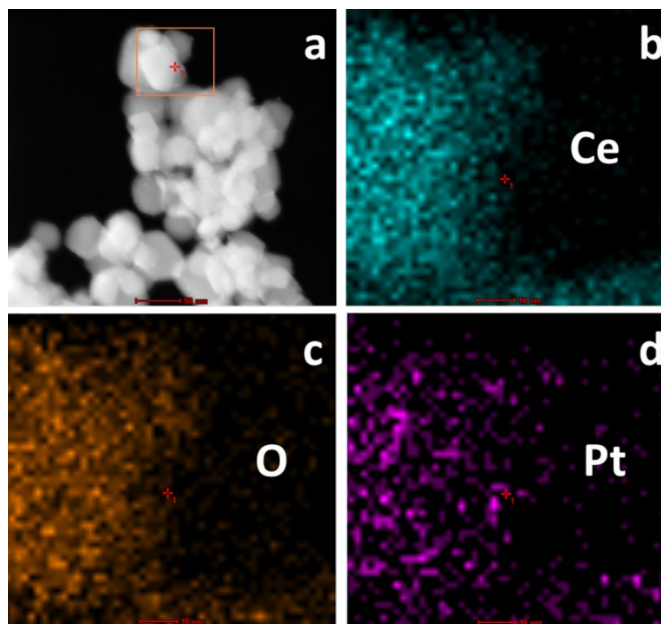

**Fig. S4.** Elemental mapping of the prepared 2Pt-CeO<sub>2</sub><sup>PS</sup> catalyst.

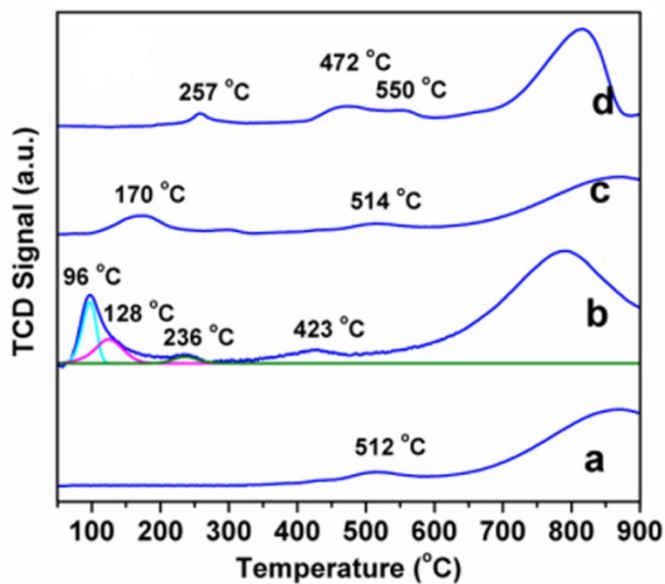

**Fig. S5.** CO-TPR of (a) CeO<sub>2</sub><sup>HT</sup>, (b) 2Pt-CeO<sub>2</sub><sup>PS</sup>, (c) 2Pt-CeO<sub>2</sub><sup>PSCom</sup> and (d) 2Pt-CeO<sub>2</sub><sup>Imp</sup> catalyst.

The reduction behavior of CeO<sub>2</sub><sup>HT</sup>, 2Pt-CeO<sub>2</sub><sup>PS</sup>, 2Pt-CeO<sub>2</sub><sup>PSCom</sup> and 2Pt-CeO<sub>2</sub><sup>Imp</sup> catalysts was also examined through CO-TPR by monitoring the CO consumption and the production of CO<sub>2</sub>. The corresponding patterns are shown in Fig. 4(ii). CO can also be used as a reducing agent to

characterize the reducibility of the catalyst.<sup>1, 2</sup> CO reduces the surface CeO<sub>2</sub> at lower temperatures as compared to H<sub>2</sub> because the adsorbed H<sub>2</sub> needs to be dissociated to achieve the reduction of Pt or CeO<sub>2</sub>, whereas, CO can directly reduce the surface oxygen in CeO<sub>2</sub>.<sup>1</sup> We believe that due to the small size of Pt particle, it is easier to reduce the Pt species compared to the bigger Pt particles for other catalysts. In case of Pt-CeO<sub>2</sub><sup>Imp</sup> (Fig. 4(ii)d), two reduction peaks appeared around 472 °C due to bulk Pt-oxide species and 550 °C due to surface layer reduction of CeO<sub>2</sub>.<sup>3</sup>

### References:

1. H. Zhu, Z. Qin, W. Shan, W. Shen and J. Wang, *J. Catal.*, 2004, 225, 267.
2. J. Bilik, P. Pustejovska, S. Brozova and S. Jursova, *Scientia Iranica B*, 2013, 20(2), 337.
3. A. Scarabello, D. D. Nogare, P. Canu and R. Lanza, *App. Catal. B: Environmental*, 2015, 174, 308.

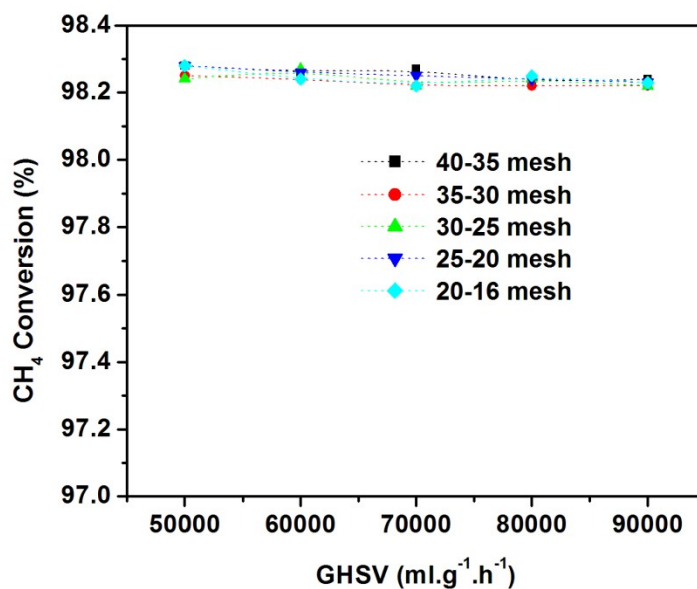

**Fig. S6** Effect of pellet size and GHSV.

**Reaction condition:** catalyst (120 mg) diluted with ground quartz, Temperature (800 °C), O<sub>2</sub> : CH<sub>4</sub> : He = 1:1:7 (feed ratio), Pressure (1 atm.).

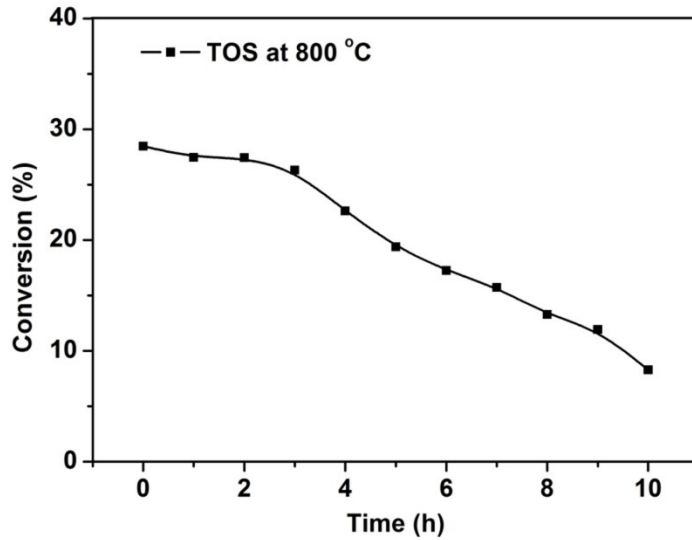

**Fig. S7.** Effect of TOS over 2Pt-CeO<sub>2</sub><sup>Imp</sup> catalyst at 800 °C.

**Reaction condition:** Pressure (1atm), GHSV (80000 mlg<sup>-1</sup>h<sup>-1</sup>), Feed ratio (O<sub>2</sub>:CH<sub>4</sub>:He = 1:2:7).

**Mass and Heat Transfer Calculations for Partial oxidation of methane upon 2Pt-CeO<sub>2</sub><sup>PS</sup> catalyst at 800 °C**

For PBR reaction mode (10 O<sub>2</sub> / 20 CH<sub>4</sub> / 70 He) with respect to Methane

**Mears Criterion for External Diffusion**

If  $\frac{-r_A' \rho_b R n}{k_c C_{Ab}} < 0.15$ , then external mass transfer effects can be neglected.

$-r_A'$  = reaction rate, kmol/kg-cat · s

n = reaction order

R = catalyst particle radius, m

$\rho_b$  = bulk density of catalyst bed, kg/m<sup>3</sup>

= (1- $\phi$ ) ( $\phi$ = porosity or void fraction of packed bed)

$\rho_c$  = solid catalyst density, kg/m<sup>3</sup>

$C_{Ab}$  = bulk gas concentration of A, kmol/m<sup>3</sup>

$k_c$  = mass transfer coefficient, m/s

$$\frac{-r'_A \rho_b R n}{k_c C_{Ab}} = [1.91 \times 10^{-04} \text{ kmol-C}_3/\text{kg-cat.s} \times 1000] [367 \text{ kg/m}^3] [5.3 \times 10^{-5} \text{ m}] [0.75] / ([1.02 \text{ m/s}] \times [0.0508 \text{ kmol/m}^3]) = 5.3774 \times 10^{-2} < 0.15 \text{ \{Mears for External Diffusion\}}$$

### Weisz-Prater Criterion for Internal Diffusion

If  $C_{WP} = \frac{-r'_{A(\text{obs})} \rho_c R^2}{D_e C_{As}} < 1$ , then internal mass transfer effects can be neglected.

$-r'_{A(\text{obs})}$  = observed reaction rate, kmol/kg-cat · s

R = catalyst particle radius, m

$\rho_c$  = solid catalyst density, kg/m<sup>3</sup>;

$D_e$  = effective gas-phase diffusivity, m<sup>2</sup>/s

$$= \frac{D_{AB} \phi_p \sigma_c}{\tau} \text{ where}$$

$D_{AB}$  = gas-phase diffusivity m<sup>2</sup>/s;  $\phi_p$  = pellet porosity;  $\sigma_c$  = constriction factor;  $\tau$  = tortuosity.

$C_{As}$  = gas concentration of A at the catalyst surface, kmol-A/m<sup>3</sup>

$$C_{WP} = \frac{-r'_{A(\text{obs})} \rho_c R^2}{D_e C_{As}} = [1.91 \times 10^{-04} \text{ kmol-C}_3/\text{kg-cat.s} \times 1000] \times [4.777 \times 10^3 \text{ kg-cat/m}^3] \times [5.3 \times 10^{-5} \text{ m}]^2 / ([3.74 \times 10^{-4} \text{ m}^2/\text{s}] \times [0.0508 \text{ kmol-C}_3/\text{m}^3]) = 0.85 < 1$$

**\{Weisz-Prater Criterion for Internal Diffusion\}**

### Mears Criterion for External (Interphase) Heat Transfer

$$\left| \frac{-\Delta H_r (-r'_A) \rho_b R E}{h_i T_b^2 R_g} \right| < 0.15$$

$$[-52 \text{ kJ/mol} \times (-1.91 \times 10^{-04} \text{ kmol/kg-cat.s}) \times 1000 \times 367 \text{ kg-cat/m}^3 \times 5.3 \times 10^{-5} \text{ m} \times 65.75 \text{ kJ/mol}] / [5.325 \text{ kJ/m}^2 \cdot \text{K} \cdot \text{s} \times 1073^2 \text{ K}^2 \times 8.314 \times 10^{-3} \text{ kJ/mol} \cdot \text{K}] = 2.49 \times 10^{-4} < 0.15$$

**\{Mears Criterion for External (Interphase) Heat Transfer\}**

**Mears Criterion for Combined Interphase and Intraparticle Heat and Mass Transport  
(Mears, 1971)**

$$\frac{-r'_A R^2}{C_{Ab} D_e} < \frac{1 + 0.33\gamma\chi}{|n - \gamma_b \beta_b| (1 + 0.33n\omega)}$$

$$\gamma = \frac{E}{R_g T_s}; \quad \gamma_b = \frac{E}{R_g T_b}; \quad \beta_b = \frac{(-\Delta H_r) D_e C_{Ab}}{\lambda T_b}; \quad \chi = \frac{(-\Delta H_r) - r'_A R}{h_t T_b}; \quad \omega = \frac{-r'_A R}{k_c C_{Ab}}$$

$\gamma$  = Arrhenius number;  $\beta_b$  = heat generation function;

$\lambda$  = catalyst thermal conductivity, W/m.K;

$\chi$  = Damköhler number for interphase heat transport

$\omega$  = Damköhler number for interphase mass transport

$$\frac{-r'_A R^2}{C_{Ab} D_e} = [1.91 \times 10^{-04} \text{ kmol/kg-cat.s} \times 1000 \times (5.3 \times 10^{-5})^2 \text{ m}^2] / [0.0508 \text{ kmol/m}^3 \times 3.74 \times 10^{-4} \text{ m}^2/\text{s}] = 2.82 \times 10^{-5} < 3$$

**{Mears Criterion for Interphase and Intraparticle Heat and Mass Transport }**
